# Supplementary material for: Tumor CTLA-4 overexpression predicts poor survival in patients with nasopharyngeal carcinoma
Source: PubMed Central journal article supplement (PMC4914341; doi:10.18632/oncotarget.7421), 2016-02-16
Supplement: oncotarget-07-13060-s001.pdf [file oncotarget-07-13060-s001.pdf]

## Tumor CTLA-4 overexpression predicts poor survival in patients with nasopharyngeal carcinoma

### Supplementary Materials

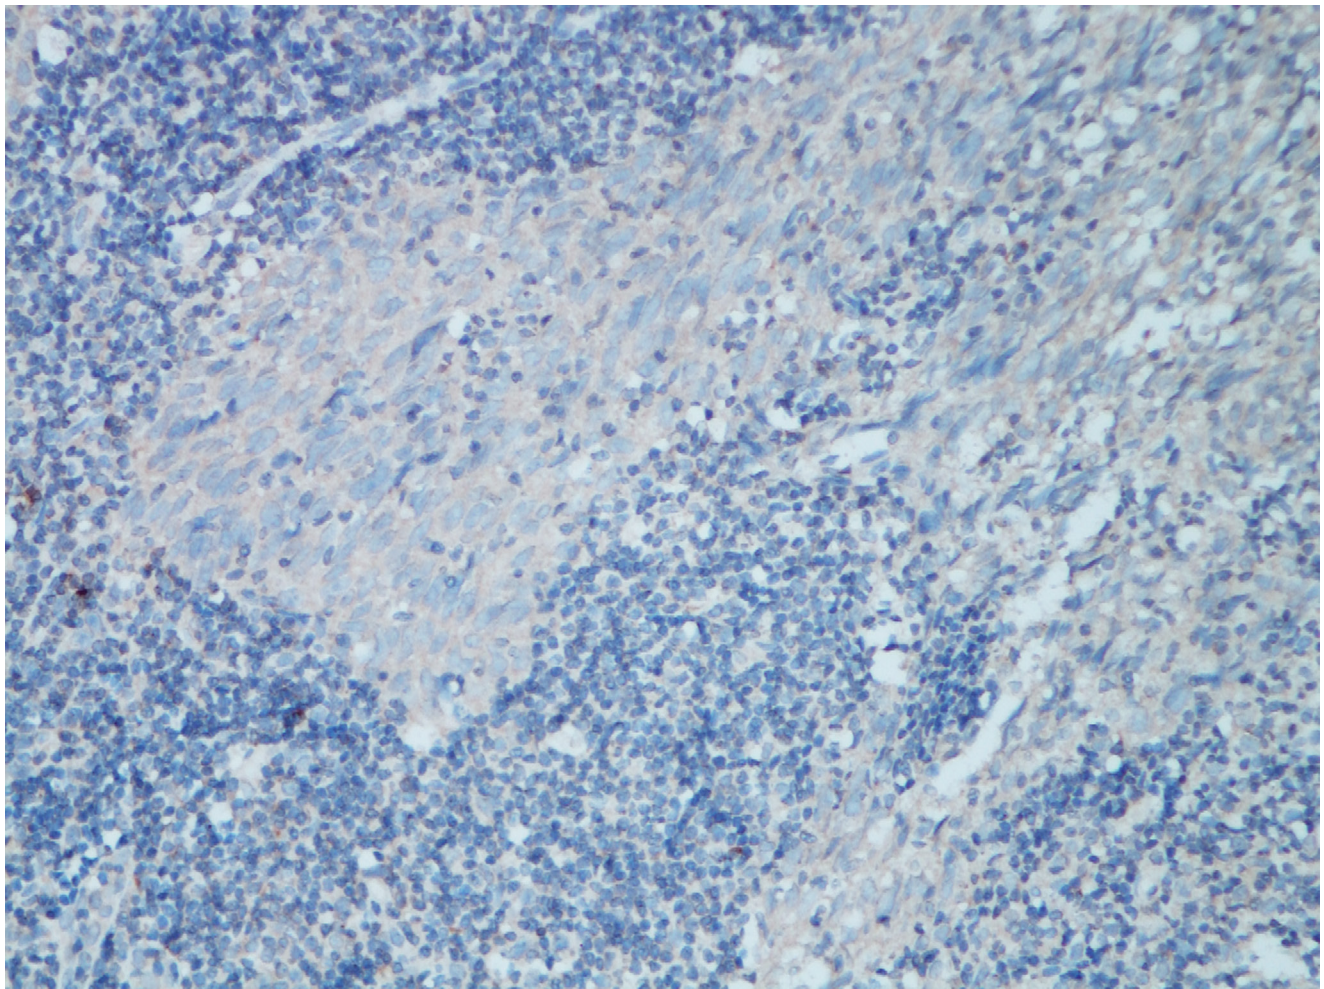

Supplementary Figure S1: The IHC staining for CTLA-4 expression (200 ×) using Santa cruz antibody.

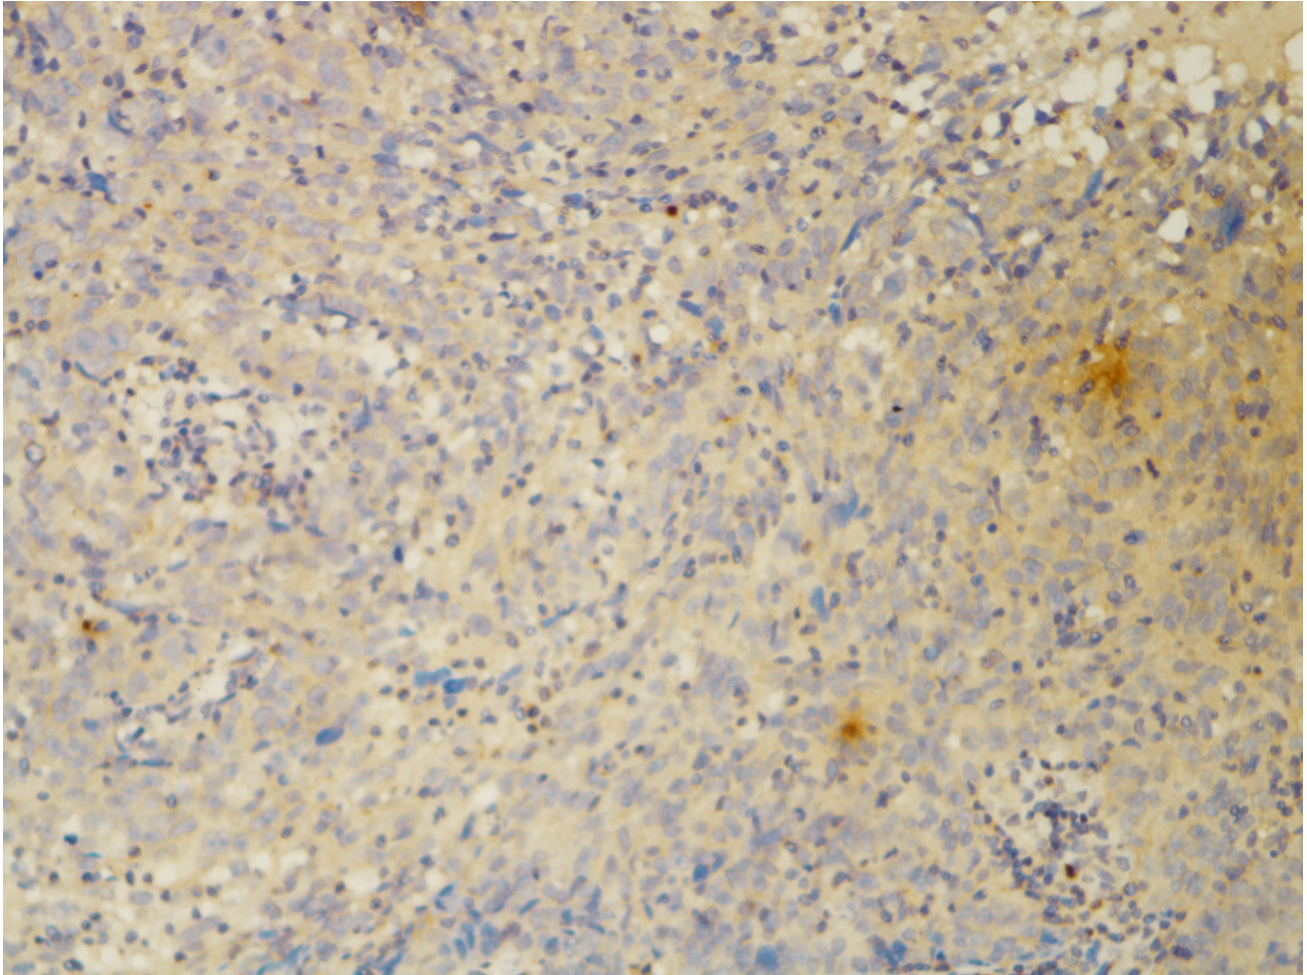

**Supplementary Figure S2: The IHC staining for CD28 expression (200 ×) using abcam antibody.**

**Supplementary Table S1: Significant factors in multivariate analysis including lymphocyte CTLA-4 expression of different endpoint in Cox regression model**

| Characteristics   | OS    |             |         | FFS   |             |         | D-FFS |              |         | LR-FFS |             |         |
|-------------------|-------|-------------|---------|-------|-------------|---------|-------|--------------|---------|--------|-------------|---------|
|                   | HR    | 95% CI      | P value | HR    | 95% CI      | P value | HR    | 95% CI       | P value | HR     | 95% CI      | P value |
| Lymphocyte CTLA-4 | *     |             |         | 1.669 | 0.926–3.006 | 0.088   | 1.768 | 0.936–3.343  | 0.079   | *      |             |         |
| BMI               | 0.775 | 0.675–0.888 | 0.000   | 0.909 | 0.825–1.001 | 0.053   | 0.913 | 0.822–1.013  | 0.087   | 0.819  | 0.665–1.008 | 0.059   |
| UICC stage        | 1.886 | 1.144–3.107 | 0.013   | 5.307 | 2.899–9.716 | 0.000   | 6.422 | 3.264–12.632 | 0.000   | 2.029  | 0.906–4.544 | 0.085   |
| CRP               | 1.045 | 1.019–1.071 | 0.001   | 1.026 | 1.003–1.049 | 0.027   | 1.031 | 1.008–1.053  | 0.007   | *      |             |         |

Abbreviations: OS, overall survival; FFS, failure free survival; D-FFS, distant failure-free survival; LR-FFS, local/regional failure-free survival.\* Not a significant factor.

**Supplementary Table S2: Significant factors in multivariate analysis including tumor CD28 expression of different endpoint in Cox regression model**

| Characteristics | OS    |             |         | FFS   |              |         | D-FFS |              |         | LR-FFS |             |         |
|-----------------|-------|-------------|---------|-------|--------------|---------|-------|--------------|---------|--------|-------------|---------|
|                 | HR    | 95% CI      | P value | HR    | 95% CI       | P value | HR    | 95% CI       | P value | HR     | 95% CI      | P value |
| BMI             | 0.775 | 0.675–0.888 | 0.000   | 0.915 | 0.833–1.006  | 0.066   | *     |              |         | 0.819  | 0.665–1.008 | 0.059   |
| UICC stage      | 1.886 | 1.144–3.107 | 0.013   | 5.531 | 3.023–10.119 | 0.000   | 7.117 | 3.699–13.925 | 0.000   | 2.029  | 0.906–4.544 | 0.085   |
| CRP             | 1.045 | 1.019–1.071 | 0.001   | 1.024 | 1.002–1.046  | 0.033   | 1.028 | 1.007–1.050  | 0.009   | *      |             |         |

Abbreviations: OS, overall survival; FFS, failure free survival; D-FFS, distant failure-free survival; LR-FFS, localregional failure-free survival.\* Not a significant factor.

**Supplementary Table S3: Significant factors in multivariate analysis including lymphocyte CD28 expression of different endpoint in Cox regression model**

| Characteristics | OS    |             |         | FFS   |              |         | D-FFS |              |         | LR-FFS |             |         |
|-----------------|-------|-------------|---------|-------|--------------|---------|-------|--------------|---------|--------|-------------|---------|
|                 | HR    | 95% CI      | P value | HR    | 95% CI       | P value | HR    | 95% CI       | P value | HR     | 95% CI      | P value |
| BMI             | 0.775 | 0.675–0.888 | 0.000   | 0.915 | 0.833–1.006  | 0.066   | *     |              |         | 0.819  | 0.665–1.008 | 0.059   |
| UICC stage      | 1.886 | 1.144–3.107 | 0.013   | 5.531 | 3.023–10.119 | 0.000   | 7.177 | 3.699–13.925 | 0.000   | 2.029  | 0.906–4.544 | 0.085   |
| CRP             | 1.045 | 1.019–1.071 | 0.001   | 1.024 | 1.002–1.046  | 0.033   | 1.028 | 1.007–1.050  | 0.009   | *      |             |         |

Abbreviations: OS, overall survival; FFS, failure free survival; D-FFS, distant failure-free survival; LR-FFS, local regional failure-free survival.\* Not a significant factor.
